# Supplementary material
Source: PubMed Central journal article supplement (PMC2791582)
Supplement: 0911351106_0911351106SI.pdf [file 0911351106_0911351106SI.pdf]

# Supporting Information

Ritchie et al. 10.1073/pnas.0911351106

## SI Text

**Animal Housing.** Mice were housed in open-top cages, on a 12-h light/12-h dark cycle, with ad libitum access to water and food (standard RM1 diet, Special Diets Services). Regular health screening was carried out to Federation of European Laboratory Animal Science Associations guidelines; no bacterial infections were detected, although a low level of unidentified coronavirus and murine norovirus infection was recorded. However, regular veterinary inspection found no evidence of any clinical symptoms.

**LOH Analysis.** To detect LOH in adenomas, we used a PCR method which utilized mismatched primers as described in ref. 1. Briefly, amplification of the *Apc<sup>Min</sup>* allele produces a 155-bp product containing a single HindIII site, in contrast to the 155-bp PCR product generated from the *Apc<sup>+</sup>* allele, which contains two HindIII sites. Following HindIII digestion of an *Apc<sup>Min/+</sup>* sample, two products are produced: a 123-bp product from the *Apc<sup>+</sup>* allele and a 144-bp product from the *Apc<sup>Min</sup>* allele. However, in tissue in which LOH has occurred, only one band is generated (144 bp) from the remaining *Apc<sup>Min</sup>* allele.

**Tissue Harvest.** The last 5 cm of the distal colon was harvested from 10-week-old mice and immediately frozen. The frozen tissue was then ground into a fine powder using a pestle and mortar containing liquid nitrogen. The ground tissue was then weighed and three times weight-to-volume added of tissue lysis

buffer (50 mM Tris·HCl pH 7.5, 1 mM EDTA, 1 mM EGTA, 1 mM sodium orthovanadate, 10 mM sodium  $\beta$ -glycerophosphate, 50 mM sodium fluoride, 5 mM sodium pyrophosphate, 0.27 M sucrose, 1% (vol/vol) Triton x-100, 0.1% (vol/vol) 2-mercaptoethanol, and protease inhibitor mixture (one tablet/50 ml). The lysates were then centrifuged at  $16,000 \times g$  for 10 min at 4 °C and the supernatants stored at  $-20$  °C.

**Immunoblotting.** Samples were denatured in SDS before being run on polyacrylamide gels, after which they were transferred to nitrocellulose membranes. The membranes were then blocked for 1 h at room temperature in 50 mM Tris·HCl pH 7.5, 150 mM NaCl, 0.2% Tween (TBST), and 5% skimmed milk powder. Membranes were then incubated overnight at 4 °C with gentle rocking with antisera to *Gstp1*, *Gstm1*, *Gsta1* NQ01, HO-1 (Abcam) or actin (Sigma) in TBST 5% BSA. The following day, membranes were washed three times with TBST (5 min per wash) and then exposed to secondary antibody in TBST containing 5% (wt/vol) skimmed milk powder. Membranes were then washed four times with TBST (5 min per wash) and immunoreactive proteins visualised with ECL plus (Amersham) reagent according to the manufacturer's instructions. Stripping of membranes, if required, was accomplished using Re-Blot Plus mild antibody stripping solution (Chemicon International).

**DNA Adduct Determination.** Oxidative DNA adducts were determined as described in ref. 2.

1. Luongo C, Moser AR, Gledhill S, Dove WF (1994) Loss of *Apc<sup>+</sup>* in intestinal adenomas from *Min* mice. *Cancer Res* 54:5947–5952.
2. Singh R, et al. (2009) Simultaneous determination of 8-oxo-2'-deoxyguanosine and 8-oxo-2'-deoxyadenosine in DNA using online column-switching liquid chromatography/tandem mass spectrometry. *Rapid Commun Mass Spectrom* 23:151–160.

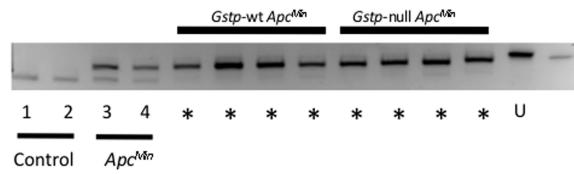

**Fig. S1.** LOH analysis. *Apc* LOH analysis of colon adenomas. (*Top band*) HindIII-digested *Apc<sup>Min</sup>* PCR product; (*Bottom band*) wild-type *Apc* allele cut by HindIII. (*Lane 1*) Normal-appearing colonic crypts from a *Gstp1/p2<sup>+/+</sup>* mouse; (*Lane 2*) normal-appearing colonic crypts from a *Gstp1/p2<sup>-/-</sup>* mouse; (*Lane 3*) normal-appearing colonic crypts from a *Gstp-wt Apc<sup>Min</sup>* mouse; (*Lane 4*) normal-appearing colonic crypts from a *Gstp-null Apc<sup>Min</sup>* mouse; (*Lane U*) undigested PCR product. The band ratio (*Apc<sup>+</sup>/Apc<sup>Min</sup>*) in each sample was compared with the control lane. Asterisks represent colon adenomas showing a low band ratio (*Apc<sup>+</sup>/Apc<sup>Min</sup>*) and, therefore, LOH.

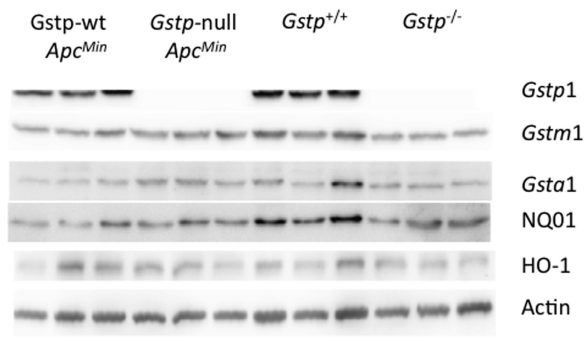

**Fig. S2.** Immunoblotting of colon tissue. Western blot analysis of colon tissue harvested from 10-week-old mice showing lack of induction of common oxidative stress genes between *Gstp*-wt *Apc*<sup>Min</sup> and *Gstp*-null *Apc*<sup>Min</sup> mice, or between *Gstp*-wt and *Gstp*-null mice. For further details, see the [SI Text](#).

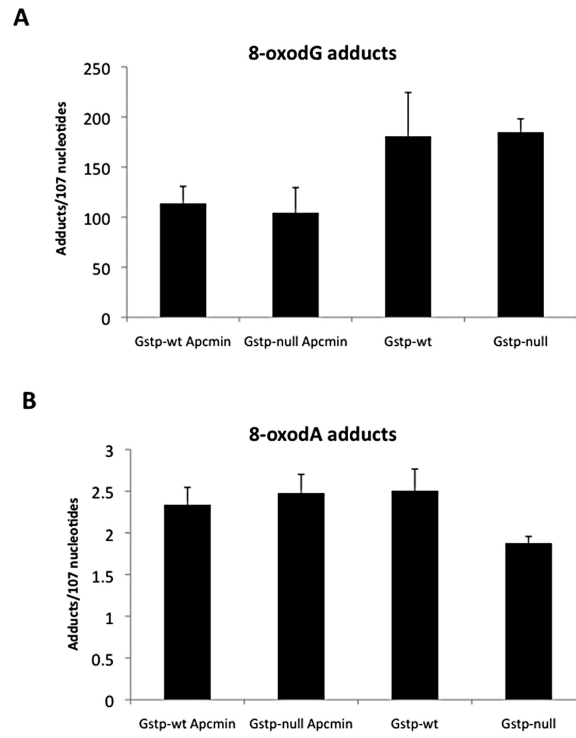

**Fig. S3.** DNA adduct levels Comparison of (A) 8-oxodG and (B) 8-oxodA levels in mouse colon DNA. The error bars represent standard error of the mean of the average of between three and four individual animals per genotype investigated.

Table S1.

| Accession ID | Gene Symbol         | Fold Change | SD  | Accession ID | Gene Symbol        | Fold Change | SD  |
|--------------|---------------------|-------------|-----|--------------|--------------------|-------------|-----|
| NM_011314    | Saa2                | 449         | 4.1 | NM_029627    | Ly6k               | 4.4         | 1.2 |
| NM_177744    | 9030421J09Rik       | 229         | 1.7 | NM_009695    | Apoc2              | 4.4         | 1.2 |
| NM_009117    | Saa1                | 185         | 4.0 | BC098210     | Pla2 g4b           | 4.3         | 1.4 |
| AK017277     | 5430405N12Rik       | 91          | 1.2 | NM_175181    | 2600010E01Rik      | 4.3         | 1.3 |
| NM_008570    | Mcpt1               | 71          | 1.7 | NM_007695    | Chi3l1             | 4.3         | 1.3 |
| NM_008571    | Mcpt2               | 66          | 1.7 | NM_145457    | Paip1              | 4.2         | 1.2 |
| NM_010779    | Mcpt4               | 50          | 1.5 | NM_032541    | Hamp1              | 4.2         | 1.4 |
| NM_010782    | Mcpt9               | 50          | 1.3 | AK013806     | 2900079G21Rik      | 4.2         | 1.4 |
| BQ938713     | Pla2 g2a            | 47          | 2.0 | AK019808     | ENSMUST00000056619 | 4.2         | 1.1 |
| NM_010779    | Mcpt4               | 46          | 1.5 | AK018656     | Fer1l4             | 4.2         | 1.2 |
| AK136384     | AK136384            | 38          | 1.1 | NM_172523    | Slc18a2            | 4.1         | 1.2 |
| NM_009117    | Saa1                | 27          | 2.6 | AK041055     | AK041055           | 4.1         | 1.1 |
| NM_011315    | Saa3                | 24          | 2.3 | BC016255     | Pla2 g4b           | 4.0         | 1.4 |
| NM_010370    | Gzma                | 20          | 1.5 | AK013531     | 2900016B01Rik      | 4.0         | 1.2 |
| NM_007753    | Cpa3                | 20          | 1.4 | NM_028815    | Lrriq2             | 4.0         | 1.4 |
| AK041235     | Igh-4               | 19          | 1.7 | NM_008399    | Itgae              | 4.0         | 1.1 |
| AK041235     | Igh-4               | 19          | 1.7 | NM_001034037 | 1700024G13Rik      | 3.9         | 1.2 |
| X87228       | Igh-4               | 18          | 1.7 | NM_130904    | Cd209d             | 3.9         | 1.2 |
| NM_027028    | 1700008P20Rik       | 15          | 1.7 | NM_008196    | Gzmk               | 3.9         | 1.4 |
| M22933       | ENSMUST00000003868  | 13          | 1.7 | AK011866     | 2610203C22Rik      | 3.9         | 1.5 |
| NM_013748    | Clnk                | 11          | 1.4 | NM_010604    | Kcnj16             | 3.9         | 1.5 |
| NM_010184    | Fcer1a              | 11          | 1.2 | AK047982     | Rtn4               | 3.9         | 1.4 |
| AK033677     | 2210010C17Rik       | 11          | 1.3 | NM_031367    | H28                | 3.8         | 1.4 |
| NM_019779    | Cyp11a1             | 11          | 1.2 | NM_009556    | Zfp42              | 3.8         | 1.3 |
| NM_008324    | Indo                | 11          | 1.6 | NM_201645    | Ugt1a1             | 3.8         | 1.3 |
| NM_010326    | Gp1ba               | 11          | 1.3 | NM_153484    | Tef                | 3.7         | 1.4 |
| NM_133353    | Oosp1               | 11          | 1.3 | NM_008812    | Padi2              | 3.7         | 1.2 |
| AK008696     | 2210010C17Rik       | 9.3         | 1.3 | AK085190     | D530004J12Rik      | 3.6         | 1.3 |
| NM_133353    | Oosp1               | 9.3         | 1.3 | NM_023137    | Ubd                | 3.6         | 1.4 |
| NM_175531    | Mrgprb2             | 9.1         | 1.5 | NM_172944    | Itgae              | 3.6         | 1.1 |
| NM_080288    | Elmo1               | 8.3         | 1.2 | AJ294737     | ENSMUST00000003582 | 3.6         | 1.3 |
| XM_978574    | 1700124P09Rik       | 8.3         | 1.2 | NM_021283    | Il4                | 3.5         | 1.2 |
| NM_026184    | Ero1lb              | 7.9         | 1.3 | NM_138654    | AF397014           | 3.5         | 1.3 |
| AK088994     | AK088994            | 7.9         | 1.3 | NM_010401    | Hal                | 3.5         | 1.2 |
| NM_009252    | Serpina3n           | 7.2         | 1.5 | AK045575     | Tef                | 3.5         | 1.4 |
| NM_177820    | 9130218O11Rik       | 7.1         | 1.3 | NM_028772    | Dmgdh              | 3.5         | 1.4 |
| AK033022     | AK033022            | 7.1         | 1.4 | NM_031367    | H28                | 3.5         | 1.4 |
| BC030896     | Pdgfd               | 6.6         | 1.7 | NM_025997    | 2610204K14Rik      | 3.5         | 1.4 |
| NM_175391    | 2210421G13Rik       | 6.5         | 1.4 | NM_008370    | Il5ra              | 3.4         | 1.4 |
| AK170776     | ENSMUST000000066907 | 6.1         | 1.1 | NM_024253    | Nkg7               | 3.4         | 1.2 |
| NM_019779    | Cyp11a1             | 6.1         | 1.2 | NM_010251    | Gabra4             | 3.4         | 1.4 |
| NM_013542    | Gzmb                | 6.0         | 1.4 | NM_024253    | Nkg7               | 3.4         | 1.2 |
| AK033329     | AK033329            | 6.0         | 1.1 | AK054077     | Al314180           | 3.3         | 1.3 |
| AK051460     | Adarb2              | 5.8         | 1.4 | NM_181596    | Retnlg             | 3.3         | 1.4 |
| NM_001025602 | Il1rl1              | 5.7         | 1.2 | NM_009977    | Cst7               | 3.3         | 1.1 |
| NM_015819    | Hs6 st2             | 5.7         | 1.2 | XR_002113    | LOC667984          | 3.3         | 1.2 |
| XM_618738    | Lats1               | 5.5         | 1.2 | U59155       | Igk-V19-14         | 3.3         | 1.4 |
| NM_013516    | Ms4a2               | 5.4         | 1.2 | NM_026158    | 0610042E07Rik      | 3.3         | 1.3 |
| TC1510329    | TC1510329           | 5.2         | 1.4 | NM_021386    | Cldn10             | 3.2         | 1.3 |
| NM_010604    | Kcnj16              | 4.9         | 1.6 | AK088128     | Cd8a               | 3.2         | 1.2 |
| BC092269     | Ighg                | 4.9         | 1.3 | NM_019577    | Ccl24              | 3.2         | 1.3 |
| NM_010781    | Mcpt6               | 4.9         | 1.3 | NM_001033177 | Krt76              | 3.2         | 1.3 |
| NM_053113    | Ear11               | 4.8         | 1.3 | AK050122     | BC020489           | 3.2         | 1.3 |
| NM_028443    | 3110032G18Rik       | 4.8         | 1.3 | NM_020509    | Retnla             | 3.2         | 1.3 |
| NM_175391    | 2210421G13Rik       | 4.7         | 1.3 | NM_020509    | Retnla             | 3.1         | 1.3 |
| AK080874     | Depdc6              | 4.7         | 1.5 | NM_021792    | ligp1              | 3.1         | 1.4 |
| AK084367     | AK084367            | 4.7         | 1.2 | NM_029898    | Ankrd55            | 3.1         | 1.4 |
| NM_010780    | Cma1                | 4.6         | 1.2 | NM_011066    | Per2               | 3.1         | 1.3 |
| BC030679     | Cd8a                | 4.6         | 1.2 | NM_130905    | Cd209e             | 3.1         | 1.4 |
| NM_010780    | Cma1                | 4.6         | 1.2 | AK161130     | 4933439C20Rik      | 3.0         | 1.1 |
| NM_021443    | Ccl8                | 4.6         | 1.2 | NM_013653    | Ccl5               | 3.0         | 1.3 |
| NM_001024468 | Bcat1               | 4.6         | 1.4 | XM_284386    | ENSMUST00000078702 | 3.0         | 1.3 |
| NM_001001500 | 9830163H01Rik       | 4.5         | 1.5 | NM_138684    | Wfdc12             | 3.0         | 1.3 |
| NM_145457    | Paip1               | 4.5         | 1.3 | XM_001003829 | LOC193676          | 3.0         | 1.3 |
|              |                     |             |     | NM_029865    | 9430098E02Rik      | 3.0         | 1.2 |

| Accession ID | Gene Symbol        | Fold Change | SD  | Accession ID | Gene Symbol   | Fold Change | SD  |
|--------------|--------------------|-------------|-----|--------------|---------------|-------------|-----|
| BC033508     | Ccl5               | 3.0         | 1.3 | NM_008330    | Ifi47         | 2.5         | 1.2 |
| AK088370     | Ssb                | 3.0         | 1.3 | NM_175271    | Gpr23         | 2.5         | 1.3 |
| NM_021718    | Ms4a4b             | 3.0         | 1.2 | NM_010531    | Il18bp        | 2.5         | 1.2 |
| NM_153484    | Tef                | 3.0         | 1.3 | AK136456     | Al451617      | 2.5         | 1.3 |
| NM_001033335 | Serpina3f          | 3.0         | 1.3 | NM_016808    | Usp2          | 2.4         | 1.2 |
| NM_026972    | Cd209b             | 2.9         | 1.2 | NM_011216    | Ptpro         | 2.4         | 1.2 |
| NM_138654    | AF397014           | 2.9         | 1.2 | NM_026621    | 2810046M22Rik | 2.4         | 1.1 |
| NM_033079    | D6Mm5e             | 2.9         | 1.3 | NM_012046    | Spo11         | 2.4         | 1.1 |
| AK043005     | AK043005           | 2.9         | 1.2 | NM_177677    | Dnajc5 g      | 2.4         | 1.3 |
| NM_025478    | Isoc1              | 2.9         | 1.1 | NM_026972    | Cd209b        | 2.4         | 1.2 |
| NM_010575    | Itga2b             | 2.9         | 1.2 | NM_145227    | Oas2          | 2.4         | 1.2 |
| BC051162     | ENSMUST00000067474 | 2.9         | 1.2 | NM_008332    | Ifit2         | 2.4         | 1.3 |
| AK005544     | Sel1 h             | 2.9         | 1.3 | NM_018738    | Igtp          | 2.4         | 1.3 |
| X03802       | Tcrg-C             | 2.9         | 1.3 | AK050249     | AK050249      | 2.4         | 1.2 |
| TC1410591    | TC1410591          | 2.9         | 1.2 | NM_001002786 | 9830134C10Rik | 2.4         | 1.2 |
| NM_009662    | Alox5              | 2.8         | 1.2 | AK086785     | AK086785      | 2.4         | 1.2 |
| NM_021464    | Ptprt              | 2.8         | 1.3 | AK088666     | Igh-6         | 2.4         | 1.3 |
| NM_027561    | 4632415L05Rik      | 2.8         | 1.1 | BC004622     | Gas5          | 2.4         | 1.3 |
| AK035046     | AK035046           | 2.8         | 1.1 | AK050412     | 1810008I18Rik | 2.4         | 1.3 |
| AK088414     | Cd8a               | 2.8         | 1.2 | NM_011983    | Homer2        | 2.4         | 1.2 |
| NM_009854    | Cd7                | 2.8         | 1.2 | NM_130880    | Otud7a        | 2.4         | 1.2 |
| NM_028176    | Cda                | 2.8         | 1.2 | NM_010583    | Itk           | 2.3         | 1.2 |
| NM_172523    | Slc18a2            | 2.8         | 1.2 | NM_145226    | Oas3          | 2.3         | 1.2 |
| AK164165     | Cd47               | 2.8         | 1.1 | AK034139     | Dnahc5        | 2.3         | 1.3 |
| NM_010470    | Hp1bp3             | 2.7         | 1.2 | NM_011065    | Per1          | 2.3         | 1.2 |
| NM_009858    | Cd8b1              | 2.7         | 1.2 | NM_009251    | Serpina3 g    | 2.3         | 1.2 |
| NM_133871    | Ifi44              | 2.7         | 1.3 | NM_007587    | Calca         | 2.3         | 1.2 |
| XM_129603    | Tdrd5              | 2.7         | 1.3 | NM_010177    | Fasl          | 2.3         | 1.2 |
| AK163452     | Aldh2              | 2.7         | 1.3 | NM_018746    | Itih4         | 2.3         | 1.2 |
| AK034237     | Slc4a8             | 2.7         | 1.2 | NM_010531    | Il18bp        | 2.3         | 1.2 |
| NM_007972    | F10                | 2.7         | 1.2 | XM_138240    | LOC238395     | 2.3         | 1.2 |
| NM_008090    | Gata2              | 2.7         | 1.2 | NM_133888    | Smpd13b       | 2.3         | 1.2 |
| NM_172648    | Ifi205             | 2.7         | 1.2 | AK079989     | Air           | 2.3         | 1.1 |
| AJ426449     | Spink5             | 2.7         | 1.3 | NM_010330    | Emb           | 2.3         | 1.1 |
| NM_153484    | Tef                | 2.7         | 1.3 | NM_007652    | Cd59a         | 2.3         | 1.1 |
| NM_145227    | Oas2               | 2.7         | 1.3 | NM_011983    | Homer2        | 2.3         | 1.1 |
| AK084979     | 2010007H06Rik      | 2.7         | 1.3 | NM_021718    | Ms4a4b        | 2.3         | 1.1 |
| AK162987     | AK162987           | 2.7         | 1.3 | NM_173047    | Cbr3          | 2.3         | 1.1 |
| AK036477     | AK036477           | 2.7         | 1.3 | NM_008332    | Ifit2         | 2.3         | 1.3 |
| NM_033616    | Csprs              | 2.7         | 1.2 | NM_012009    | Sh2d1b1       | 2.2         | 1.2 |
| BC024498     | Tm6 sf2            | 2.6         | 1.2 | NM_009850    | Cd3 g         | 2.2         | 1.1 |
| NM_009662    | Alox5              | 2.6         | 1.2 | NM_030696    | Slc16a3       | 2.2         | 1.1 |
| NM_019577    | Ccl24              | 2.6         | 1.2 | NM_009985    | Ctsw          | 2.2         | 1.2 |
| NM_133238    | Cd209a             | 2.6         | 1.2 | BI692008     | BI692008      | 2.2         | 1.2 |
| NM_015783    | Isg15              | 2.6         | 1.3 | XM_489019    | LOC433637     | 2.2         | 1.2 |
| NM_009662    | Alox5              | 2.6         | 1.1 | NM_009375    | Tgn           | 2.2         | 1.2 |
| NM_008090    | Gata2              | 2.6         | 1.1 | NM_145634    | Cd300lf       | 2.2         | 1.1 |
| NM_011109    | Pla2 g2d           | 2.6         | 1.1 | NM_170727    | Scgb3a1       | 2.2         | 1.2 |
| AK047983     | C130026I21Rik      | 2.6         | 1.2 | NM_181328    | Slc25a29      | 2.2         | 1.2 |
| NM_001033335 | Serpina3f          | 2.6         | 1.3 | NM_009635    | Avil          | 2.2         | 1.2 |
| NM_009253    | Serpina3m          | 2.6         | 1.2 | NM_174876    | Impg2         | 2.2         | 1.2 |
| AK007434     | 1810011H11Rik      | 2.6         | 1.2 | NM_029419    | 9130022K13Rik | 2.2         | 1.1 |
| NM_177794    | Tmem26             | 2.6         | 1.2 | AK037578     | Zfr           | 2.2         | 1.2 |
| BC098210     | Pla2 g4b           | 2.6         | 1.2 | NM_029419    | 9130022K13Rik | 2.2         | 1.2 |
| NM_008458    | Serpina3c          | 2.5         | 1.2 | AK147540     | Apob          | 2.2         | 1.1 |
| AK085279     | E230002P03Rik      | 2.5         | 1.3 | NM_010796    | Mgl1          | 2.2         | 1.1 |
| XR_003675    | LOC672028          | 2.5         | 1.2 | AK138790     | AK138790      | 2.2         | 1.1 |
| NM_025997    | 2610204K14Rik      | 2.5         | 1.3 | AK147540     | Apob          | 2.2         | 1.1 |
| AK008551     | 2010309G21Rik      | 2.5         | 1.3 | NM_023612    | Esm1          | 2.2         | 1.2 |
| NM_177158    | 5830482F20Rik      | 2.5         | 1.1 | C77713       | C77713        | 2.2         | 1.2 |
| NM_008987    | Ptx3               | 2.5         | 1.3 | NM_029239    | Prkcn         | 2.2         | 1.2 |
| NM_013637    | Prr1               | 2.5         | 1.3 | NM_009911    | Cxcr4         | 2.2         | 1.2 |
| NM_183367    | Sytl3              | 2.5         | 1.3 | NM_015812    | Rgs6          | 2.2         | 1.2 |
| AK044380     | AK044380           | 2.5         | 1.3 | NM_026516    | 2810417M05Rik | 2.2         | 1.1 |
| NM_029932    | 9830002I17Rik      | 2.5         | 1.1 | NM_023124    | H2-Q8         | 2.2         | 1.2 |

| Accession ID | Gene Symbol        | Fold Change | SD  | Accession ID | Gene Symbol        | Fold Change | SD  |
|--------------|--------------------|-------------|-----|--------------|--------------------|-------------|-----|
| NM_012048    | Polk               | 2.1         | 1.2 | AK048420     | Fzd2               | -2.1        | 1.2 |
| NM_009477    | Upp1               | 2.1         | 1.2 | NM_198429    | Nfatc1             | -2.1        | 1.1 |
| AJ344341     | Vill               | 2.1         | 1.2 | NM_026127    | 4833420G17Rik      | -2.1        | 1.1 |
| NM_010180    | Fbln1              | 2.1         | 1.2 | NM_009810    | Casp3              | -2.1        | 1.1 |
| NM_016704    | C6                 | 2.1         | 1.2 | NM_029341    | Capsl              | -2.1        | 1.2 |
| AK083703     | E430024P14Rik      | 2.1         | 1.2 | NM_030172    | 2610021K21Rik      | -2.1        | 1.2 |
| NM_024440    | Derl3              | 2.1         | 1.2 | NM_028113    | 2600011E07Rik      | -2.2        | 1.2 |
| NM_145581    | Siglecf            | 2.1         | 1.2 | AK005675     | 1700006H03Rik      | -2.2        | 1.3 |
| AK049236     | 6030465E24Rik      | 2.1         | 1.2 | NM_008360    | Il18               | -2.2        | 1.2 |
| NM_008987    | Ptx3               | 2.1         | 1.2 | NM_133818    | AI597479           | -2.2        | 1.2 |
| NM_181328    | Slc25a29           | 2.1         | 1.2 | NM_172203    | Nox1               | -2.2        | 1.2 |
| BF683009     | BF683009           | 2.1         | 1.2 | NM_026069    | Rpl37              | -2.2        | 1.2 |
| NM_013731    | Sgk2               | 2.1         | 1.2 | NM_026286    | Ftmt               | -2.2        | 1.2 |
| NM_139141    | Zfp192             | 2.1         | 1.2 | NM_133217    | Bcdo2              | -2.2        | 1.2 |
| BC052824     | Cd247              | 2.1         | 1.1 | AK140151     | Gfap               | -2.2        | 1.2 |
| NM_134164    | Syt12              | 2.1         | 1.1 | NM_001013373 | Tmprss13           | -2.2        | 1.2 |
| NM_011027    | P2rx7              | 2.1         | 1.1 | AK076671     | AK076671           | -2.2        | 1.2 |
| NM_027222    | 2010001M09Rik      | 2.1         | 1.2 | AK035414     | Ddr2               | -2.2        | 1.2 |
| NM_145209    | Oasl1              | 2.1         | 1.2 | NM_007620    | Cbr1               | -2.2        | 1.1 |
| NM_020279    | Ccl28              | 2.1         | 1.2 | NM_028667    | D3Ertd751e         | -2.3        | 1.1 |
| NM_009099    | Trim30             | 2.1         | 1.2 | NM_178886    | Ldlrad3            | -2.3        | 1.2 |
| TC1451388    | TC1451388          | 2.1         | 1.2 | NM_001013022 | 2010001J22Rik      | -2.3        | 1.2 |
| NM_012032    | Serinc3            | 2.1         | 1.2 | AK087898     | AK087898           | -2.3        | 1.3 |
| NM_013698    | Txk                | 2.1         | 1.1 | NM_025943    | Dzip1              | -2.3        | 1.2 |
| NM_144512    | Slc6a13            | 2.1         | 1.1 | XM_485258    | Mtap9              | -2.3        | 1.2 |
| NM_013487    | Cd3d               | 2.1         | 1.1 | XM_483917    | ENSMUST00000020090 | -2.3        | 1.2 |
| XM_484710    | Mocos              | 2.1         | 1.1 | NM_175535    | Arhgap20           | -2.3        | 1.1 |
| NM_207208    | Ca6                | 2.1         | 1.2 | NM_178218    | Hist3 h2a          | -2.3        | 1.1 |
| AK041725     | D030041N04Rik      | 2.1         | 1.2 | NM_007749    | Cox7c              | -2.3        | 1.1 |
| NM_010831    | Snf1lk             | 2.1         | 1.2 | NM_172825    | Gpr128             | -2.3        | 1.1 |
| NM_134041    | 4930427A07Rik      | 2.0         | 1.2 | XM_981216    | LOC666048          | -2.3        | 1.2 |
| AK153588     | E230001N04Rik      | 2.0         | 1.2 | NM_008918    | Ppy                | -2.3        | 1.2 |
| AK028129     | Hist2 h2aa2        | 2.0         | 1.2 | NM_007489    | Arntl              | -2.3        | 1.3 |
| NM_021718    | Ms4a4b             | 2.0         | 1.1 | NM_011794    | Bpnt1              | -2.3        | 1.2 |
| NM_177823    | Ubash3a            | 2.0         | 1.1 | AK089867     | AK089867           | -2.3        | 1.2 |
| NM_010587    | Itsn1              | 2.0         | 1.1 | NM_007694    | Chgb               | -2.3        | 1.2 |
| NM_010689    | Lat                | 2.0         | 1.1 | NM_010298    | Glrb               | -2.3        | 1.2 |
| NM_009283    | Stat1              | 2.0         | 1.2 | AK155758     | C920006O11Rik      | -2.4        | 1.1 |
| NM_173036    | Gpr97              | 2.0         | 1.2 | NM_028189    | B3 gnt3            | -2.4        | 1.1 |
| BC056974     | Cyfip2             | 2.0         | 1.2 | AK088810     | Dclre1c            | -2.4        | 1.2 |
| NM_009259    | Spn                | 2.0         | 1.1 | AK076318     | 4732419C18Rik      | -2.4        | 1.2 |
| NM_022026    | Aqp9               | 2.0         | 1.1 | NM_007693    | Chga               | -2.4        | 1.1 |
| XM_484710    | Mocos              | 2.0         | 1.1 | BC058790     | A930031D07Rik      | -2.4        | 1.1 |
| NM_011527    | Tal1               | 2.0         | 1.1 | U21674       | Tcte3              | -2.4        | 1.1 |
| AK085208     | Lrba               | 2.0         | 1.2 | NM_177003    | 9630033F20Rik      | -2.4        | 1.2 |
| AK079745     | AI449175           | -2.0        | 1.2 | NM_177605    | Pdzd7              | -2.4        | 1.2 |
| AK082461     | Hgf                | -2.0        | 1.2 | NM_001024849 | LOC329575          | -2.4        | 1.1 |
| NM_026592    | B230118H07Rik      | -2.0        | 1.1 | NM_009380    | Thrb               | -2.4        | 1.1 |
| AK006263     | ENSMUST00000023427 | -2.0        | 1.1 | NM_001039552 | 9030025P20Rik      | -2.4        | 1.2 |
| NM_025807    | Slc16a9            | -2.0        | 1.1 | NM_207298    | Ceecam1            | -2.4        | 1.2 |
| AK122246     | D130043K22Rik      | -2.0        | 1.2 | TC1465377    | TC1465377          | -2.4        | 1.2 |
| AK078248     | AK078248           | -2.1        | 1.2 | NM_173782    | 4631402N15Rik      | -2.4        | 1.3 |
| NM_001031808 | Mrpl41             | -2.1        | 1.0 | NM_011927    | Ceacam9            | -2.4        | 1.2 |
| NM_008729    | Cttnnd2            | -2.1        | 1.2 | NM_026056    | Cap2               | -2.5        | 1.1 |
| NM_080285    | Cttnbp2            | -2.1        | 1.2 | NM_146630    | Olfr123            | -2.5        | 1.3 |
| NM_001001488 | Atp8b1             | -2.1        | 1.1 | NM_177898    | Nek5               | -2.5        | 1.2 |
| NM_011804    | Creg1              | -2.1        | 1.1 | XM_355539    | Camta1             | -2.5        | 1.1 |
| AK156842     | Zfp236             | -2.1        | 1.1 | XM_484752    | Zfp236             | -2.5        | 1.1 |
| NM_148937    | Plcd4              | -2.1        | 1.2 | NM_133903    | Spon2              | -2.5        | 1.2 |
| AK079868     | AK079868           | -2.1        | 1.2 | AK007397     | Adh6a              | -2.5        | 1.2 |
| NM_133776    | Gpr110             | -2.1        | 1.2 | NM_194058    | Nalp9b             | -2.5        | 1.3 |
| BC035277     | D1Ertd471e         | -2.1        | 1.1 | NM_026056    | Cap2               | -2.5        | 1.1 |
| NM_018769    | Dfna5 h            | -2.1        | 1.1 | NM_001039552 | 9030025P20Rik      | -2.5        | 1.2 |
| TC1522631    | TC1522631          | -2.1        | 1.2 | NM_170778    | Dpyd               | -2.5        | 1.2 |
| AK039139     | Tfg                | -2.1        | 1.1 | NM_134130    | Abhd3              | -2.5        | 1.3 |

| Accession ID | Gene Symbol        | Fold Change | SD  | Accession ID | Gene Symbol        | Fold Change | SD  |
|--------------|--------------------|-------------|-----|--------------|--------------------|-------------|-----|
| AK158826     | Thrb               | -2.5        | 1.1 | NM_013500    | Hapln1             | -3.6        | 1.3 |
| NM_015825    | Sh3bgr             | -2.6        | 1.1 | NM_007739    | Col8a1             | -3.6        | 1.2 |
| NM_011762    | Zfp59              | -2.6        | 1.2 | AK013921     | LOC627905          | -3.6        | 1.1 |
| NM_008949    | Psmc3ip            | -2.6        | 1.1 | NM_026127    | 4833420G17Rik      | -3.6        | 1.1 |
| NM_011794    | Bpnt1              | -2.6        | 1.2 | NM_153193    | Hsd3b2             | -3.6        | 1.4 |
| AK078743     | Hmgcs1             | -2.6        | 1.2 | AK045953     | Usp53              | -3.7        | 1.4 |
| AK053189     | AK053189           | -2.6        | 1.3 | NM_028089    | Cyp2c55            | -3.8        | 1.4 |
| NM_007734    | Col4a3             | -2.6        | 1.3 | AK041002     | Tubb6              | -3.8        | 1.2 |
| AK034929     | AK034929           | -2.7        | 1.1 | AK086129     | AK086129           | -3.8        | 1.3 |
| NM_026716    | Syncn              | -2.7        | 1.3 | AK082018     | AK082018           | -3.9        | 1.5 |
| NM_029813    | 2210418O10Rik      | -2.7        | 1.2 | AK010876     | 5730409G07Rik      | -4.0        | 1.2 |
| BC059210     | 2210418O10Rik      | -2.7        | 1.1 | NM_172812    | Htr2a              | -4.1        | 1.4 |
| AK031899     | Gls                | -2.7        | 1.3 | AJ005350     | Zfp125             | -4.1        | 1.4 |
| NM_013500    | Hapln1             | -2.7        | 1.2 | AK015310     | 4930434F21Rik      | -4.2        | 1.4 |
| BC042711     | LOC626832          | -2.7        | 1.1 | NM_145509    | 5430435G22Rik      | -4.2        | 1.2 |
| NM_080563    | Rnf144             | -2.7        | 1.3 | XM_912173    | LOC636687          | -4.3        | 1.1 |
| NM_024474    | Emid2              | -2.7        | 1.2 | BC086760     | 2610005L07Rik      | -4.3        | 1.0 |
| AK005868     | 1700011I03Rik      | -2.8        | 1.3 | TC1514537    | TC1514537          | -4.4        | 1.2 |
| AK016657     | Ttc25              | -2.8        | 1.3 | AK014446     | Pvr                | -4.5        | 1.3 |
| AK083155     | ENSMUST00000047697 | -2.8        | 1.3 | NM_001024708 | LOC436177          | -4.8        | 1.0 |
| NM_008868    | Pla2_g2c           | -2.8        | 1.2 | AK019912     | 5330426P16Rik      | -4.8        | 1.2 |
| XM_977373    | AK220484           | -2.8        | 1.3 | NM_011619    | Tnnt2              | -4.8        | 1.4 |
| NM_008293    | Hsd3b1             | -2.8        | 1.3 | AK134636     | 2610005L07Rik      | -4.9        | 1.1 |
| NM_133903    | Spon2              | -2.8        | 1.2 | NM_001012306 | Hsd3b3             | -4.9        | 1.1 |
| AK049483     | Nmt2               | -2.8        | 1.2 | NM_001033456 | 2610005L07Rik      | -4.9        | 1.1 |
| AK030674     | Col8a1             | -2.9        | 1.2 | AK003102     | 1810011O10Rik      | -5.0        | 1.2 |
| AK148276     | Slc11a2            | -2.9        | 1.2 | AK050117     | AK050117           | -5.0        | 1.3 |
| NM_016847    | Avpr1a             | -2.9        | 1.2 | AK032176     | ENSMUST00000041403 | -5.3        | 1.5 |
| NM_201531    | Kcnf1              | -2.9        | 1.2 | NM_009866    | Cdh11              | -5.8        | 1.1 |
| AK013921     | LOC627905          | -2.9        | 1.1 | AK018404     | 4930429M06Rik      | -5.5        | 1.2 |
| NM_026480    | 2410146L05Rik      | -2.9        | 1.3 | NM_001024708 | LOC436177          | -6.4        | 1.3 |
| XM_129027    | Cep76              | -2.9        | 1.1 | NM_178671    | Ubx3               | -6.4        | 1.2 |
| NM_001033039 | 1190002J23Rik      | -2.9        | 1.2 | AK037592     | AK037592           | -6.5        | 1.3 |
| BC067070     | 4932415G12Rik      | -2.9        | 1.4 | NM_001029848 | LOC574530          | -6.7        | 1.7 |
| NM_011880    | Rgs7               | -2.9        | 1.2 | NM_175683    | Dclre1c            | -6.8        | 1.2 |
| NM_008949    | Psmc3ip            | -2.9        | 1.2 | NM_153193    | Hsd3b2             | -7.1        | 1.7 |
| NM_011061    | Padi4              | -2.9        | 1.2 | NM_001033286 | Slc30a10           | -7.2        | 1.3 |
| AK014177     | 3110045C21Rik      | -3.0        | 1.3 | BC022221     | Usp53              | -7.5        | 1.1 |
| NM_146126    | Sord               | -3.0        | 1.4 | NM_207531    | E030025L21Rik      | -9.0        | 1.5 |
| NM_201619    | Nr1_h5             | -3.0        | 1.2 | AK032413     | 1110039F03Rik      | -9.6        | 1.2 |
| NM_177386    | Sfmbt2             | -3.0        | 1.4 | AK081879     | LOC547150          | -9.8        | 1.2 |
| NM_008067    | Gabra3             | -3.0        | 1.3 | NM_001002900 | Yghl1-4            | -10         | 1.4 |
| AK034126     | 9330158F14Rik      | -3.0        | 1.3 | NM_029847    | Arsk               | -11         | 1.5 |
| AK037771     | Ubr1               | -3.1        | 1.4 | AK083849     | AK083849           | -16         | 2.2 |
| NM_001024708 | LOC436177          | -3.1        | 1.1 | NM_175155    | Sash1              | -17         | 1.5 |
| BC055394     | Ugcgl2             | -3.1        | 1.4 | AK015977     | 4930535E02Rik      | -20         | 2.4 |
| XM_912670    | Mgat5              | -3.1        | 1.1 | NM_001033286 | Slc30a10           | -42         | 1.5 |
| NM_173431    | 1700047E16Rik      | -3.1        | 1.3 | NM_013541    | Gstp1              | -212        | 1.4 |
| XM_144099    | Myom3              | -3.1        | 1.3 | NM_013541    | Gstp1              | -711        | 1.6 |
| NM_001033456 | 2610005L07Rik      | -3.1        | 1.2 |              |                    |             |     |
| NM_016960    | Ccl20              | -3.2        | 1.3 |              |                    |             |     |
| NM_175447    | LOC215714          | -3.2        | 1.4 |              |                    |             |     |
| XM_898153    | Cttnbp2            | -3.2        | 1.4 |              |                    |             |     |
| NM_025943    | Dzip1              | -3.3        | 1.3 |              |                    |             |     |
| AK045433     | Rsrc1              | -3.3        | 1.3 |              |                    |             |     |
| NM_007847    | Defcr-rs2          | -3.3        | 1.3 |              |                    |             |     |
| NM_026084    | 3110070M22Rik      | -3.3        | 1.3 |              |                    |             |     |
| NM_001039244 | LOC633640          | -3.3        | 1.2 |              |                    |             |     |
| NM_175155    | Sash1              | -3.3        | 1.3 |              |                    |             |     |
| XM_001004301 | LOC668030          | -3.4        | 1.3 |              |                    |             |     |
| NM_010762    | Mal                | -3.4        | 1.4 |              |                    |             |     |
| AK043729     | lars2              | -3.4        | 1.4 |              |                    |             |     |
| NM_198415    | Ckmt2              | -3.4        | 1.3 |              |                    |             |     |
| NM_172613    | Atp13a4            | -3.5        | 1.4 |              |                    |             |     |
| NM_025943    | Dzip1              | -3.5        | 1.3 |              |                    |             |     |

All genes differentially expressed in *Gstp*<sup>-/-</sup> colon relative to *Gstp*<sup>+/+</sup> colon controls. Colon RNA from three male 10 week old and three female 10 week old mice of the same genotype were used for microarray analysis. The experiments were carried out with the RNA from a single mouse on a single microarray. The results shown are the averages of the six microarrays (three male and three female); the standard deviation is given in the right-hand column. Up-regulated genes had a level > 2 times greater than that of wild-type colon tissue. Genes classified as down-regulated had a level < 2 of wild-type colon tissue.



**Table S2. Top 10 pathway enrichment results for differentially expressed genes in the distal colon of *Gstp*<sup>-/-</sup> mice relative to *Gstp*<sup>+/+</sup> mice**

| Rank | Pathway                                                             |
|------|---------------------------------------------------------------------|
| 1    | Immune response: CD16 signaling in NK cells                         |
| 2    | Immune response: PIP3 signaling in B lymphocytes                    |
| 3    | Immune response: Role of DAP12 receptors in NK cells                |
| 4    | Immune response: Immunological synapse formation                    |
| 5    | Immune response: TCR and CD28 co-stimulation in activation of NF-κB |
| 6    | Immune response: NFAT in immune response                            |
| 7    | Immune response: ICOS-ICOSL pathway in T-helper cell                |
| 8    | Immune response: CXCR4 signaling via second messenger               |
| 9    | Immune response: Antigen presentation by MHC class I                |
| 10   | Immune response: CD28 signaling                                     |

Table S3.

| Accession ID | Symbol             | Fold Change | SD  | Accession ID | Symbol             | Fold Change | SD  |
|--------------|--------------------|-------------|-----|--------------|--------------------|-------------|-----|
| NM_008581    | Mela               | 178         | 3.3 | NM_008196    | Gzmk               | 4.7         | 1.4 |
| NM_177744    | 9030421J09Rik      | 169         | 1.7 | NM_029627    | Ly6k               | 4.7         | 1.2 |
| AK017277     | 5430405N12Rik      | 83          | 1.2 | NM_028815    | Lrriq2             | 4.7         | 1.4 |
| NM_010782    | Mcpt9              | 76          | 1.3 | AK084367     | AK084367           | 4.5         | 1.2 |
| AK136384     | AK136384           | 51          | 1.1 | AB081756     | Bclp2              | 4.5         | 1.4 |
| NM_008570    | Mcpt1              | 48          | 1.7 | NM_019577    | Ccl24              | 4.5         | 1.3 |
| NM_008571    | Mcpt2              | 47          | 1.7 | NM_175271    | Gpr23              | 4.4         | 1.3 |
| NM_010779    | Mcpt4              | 40          | 1.5 | NM_138654    | AF397014           | 4.3         | 1.3 |
| NM_010370    | Gzma               | 40          | 1.5 | NM_008370    | Il5ra              | 4.3         | 1.4 |
| NM_010779    | Mcpt4              | 31          | 1.5 | AK041055     | AK041055           | 4.3         | 1.1 |
| BQ938713     | Pla2 g2a           | 19          | 2.0 | NM_009252    | Serpina3n          | 4.3         | 1.5 |
| NM_133353    | Oosp1              | 19          | 1.3 | NM_010780    | Cma1               | 4.3         | 1.2 |
| NM_175391    | 2210421G13Rik      | 17          | 1.4 | NM_010780    | Cma1               | 4.2         | 1.2 |
| AK145339     | Pla2 g4c           | 17          | 2.3 | XM_143619    | 4833413O15Rik      | 4.2         | 1.4 |
| AK034071     | AK034071           | 16          | 1.6 | NM_001033335 | Serpina3f          | 4.2         | 1.3 |
| NM_133353    | Oosp1              | 16          | 1.3 | XM_487606    | 1700027L20Rik      | 4.2         | 1.5 |
| BC030896     | Pdgd               | 15          | 1.7 | NM_008399    | Itgae              | 4.2         | 1.1 |
| NM_019779    | Cyp11a1            | 14          | 1.2 | AK040776     | AK040776           | 4.1         | 1.5 |
| NM_007753    | Cpa3               | 14          | 1.4 | NM_130456    | Nphs2              | 4.1         | 1.3 |
| NM_019779    | Cyp11a1            | 13          | 1.2 | AK085190     | D530004J12Rik      | 4.1         | 1.3 |
| NM_080288    | Elmo1              | 12          | 1.2 | AK087768     | E330018M18Rik      | 4.1         | 1.3 |
| AK088994     | AK088994           | 12          | 1.3 | AK033677     | 2210010C17Rik      | 4.0         | 1.3 |
| NM_010604    | Kcnj16             | 12          | 1.6 | AK085279     | E230002P03Rik      | 4.0         | 1.3 |
| NM_013748    | Clnk               | 11          | 1.4 | NM_019494    | Cxcl11             | 4.0         | 1.4 |
| NM_010604    | Kcnj16             | 10          | 1.6 | NM_130905    | Cd209e             | 4.0         | 1.4 |
| NM_011474    | Spr2 h             | 10          | 1.5 | NM_028443    | 3110032G18Rik      | 4.0         | 1.3 |
| NM_010184    | Fcer1a             | 9.6         | 1.2 | NM_001033335 | Serpina3f          | 3.9         | 1.3 |
| XM_618738    | Lats1              | 9.4         | 1.2 | NM_021283    | Il4                | 3.9         | 1.2 |
| NM_177820    | 9130218O11Rik      | 8.9         | 1.3 | NM_145457    | Paip1              | 3.9         | 1.2 |
| NM_010326    | Gp1ba              | 8.8         | 1.3 | NM_172944    | Itgae              | 3.8         | 1.1 |
| AK016931     | 4933426G20Rik      | 8.7         | 1.3 | AK019824     | 4930581F22Rik      | 3.8         | 1.5 |
| NM_009178    | St3 gal4           | 8.5         | 1.8 | NM_010743    | Il1r1              | 3.8         | 1.3 |
| NM_032541    | Hamp1              | 8.2         | 1.4 | NM_130904    | Cd209d             | 3.8         | 1.2 |
| NM_013542    | Gzmb               | 8.2         | 1.4 | XM_978459    | 1110067M19Rik      | 3.7         | 1.3 |
| NM_001025307 | Stx3               | 8.2         | 1.4 | AK047982     | Rtn4               | 3.7         | 1.4 |
| NM_175391    | 2210421G13Rik      | 8.2         | 1.3 | AK033022     | AK033022           | 3.7         | 1.4 |
| NM_022884    | Bhmt2              | 7.8         | 1.6 | NM_007587    | Calca              | 3.7         | 1.2 |
| NM_010604    | Kcnj16             | 7.5         | 1.5 | NM_146820    | Olfr655            | 3.6         | 1.4 |
| NM_008324    | Indo               | 7.4         | 1.6 | NM_023137    | Ubd                | 3.6         | 1.2 |
| NM_007482    | Arg1               | 7.3         | 1.4 | NM_172523    | Slc18a2            | 3.6         | 1.2 |
| NM_009178    | St3 gal4           | 7.3         | 1.7 | AK034139     | Dnahc5             | 3.5         | 1.2 |
| NM_021503    | Myoz2              | 7.1         | 1.4 | NM_177912    | AI987692           | 3.5         | 1.2 |
| NM_013516    | Ms4a2              | 7.0         | 1.2 | AK053505     | Spire1             | 3.5         | 1.4 |
| NM_001040201 | BC023105           | 7.0         | 1.6 | AK033959     | Lpin2              | 3.5         | 1.4 |
| AK041235     | Igh-4              | 6.9         | 1.7 | NM_021718    | Ms4a4b             | 3.5         | 1.2 |
| AK041235     | Igh-4              | 6.7         | 1.7 | NM_011579    | Tgtp               | 3.4         | 1.4 |
| NM_019577    | Ccl24              | 6.6         | 1.3 | NM_008987    | Ptx3               | 3.4         | 1.3 |
| XM_978574    | 1700124P09Rik      | 6.4         | 1.2 | NM_013654    | Ccl7               | 3.4         | 1.2 |
| X87228       | Igh-4              | 6.4         | 1.7 | NM_001013783 | RP23-273O7.4       | 3.4         | 1.4 |
| NM_009114    | S100a9             | 6.3         | 1.6 | NM_011990    | Slc7a11            | 3.4         | 1.2 |
| AK170776     | ENSMUST00000066907 | 6.0         | 1.1 | AJ294737     | ENSMUST00000003582 | 3.4         | 1.2 |
| NM_001025602 | Il1r1              | 5.9         | 1.2 | NM_007972    | F10                | 3.4         | 1.2 |
| AK154323     | Map4k2             | 5.9         | 1.3 | NM_201645    | Ugt1a1             | 3.4         | 1.4 |
| NM_001033177 | Krt76              | 5.8         | 1.3 | AK136456     | AI451617           | 3.4         | 1.3 |
| NM_029018    | Cd200r3            | 5.6         | 1.4 | BC030679     | Cd8a               | 3.3         | 1.3 |
| AK033329     | AK033329           | 5.6         | 1.1 | AK137098     | Stx3               | 3.3         | 1.2 |
| AK090155     | Pick1              | 5.5         | 1.5 | BC038320     | AW986112           | 3.3         | 1.4 |
| NM_206973    | Gpr152             | 5.5         | 1.5 | NM_175271    | Gpr23              | 3.3         | 1.2 |
| AF144968     | ENSMUST00000089795 | 5.4         | 1.6 | NM_009264    | Spr1a              | 3.3         | 1.3 |
| AK054077     | AI314180           | 5.2         | 1.3 | NM_001024468 | Bcat1              | 3.3         | 1.4 |
| NM_145457    | Paip1              | 5.2         | 1.3 | NM_009662    | Alox5              | 3.3         | 1.2 |
| NM_015819    | Hs6 st2            | 5.1         | 1.2 | AK008696     | 2210010C17Rik      | 3.3         | 1.3 |
| NM_053113    | Ear11              | 5.0         | 1.3 | AK034984     | 2010316F05Rik      | 3.3         | 1.3 |
| NM_007695    | Chi3l1             | 4.9         | 1.3 | NM_172727    | D330028D13Rik      | 3.3         | 1.3 |
| XM_001003829 | LOC193676          | 4.9         | 1.3 | NM_177544    | Ang4               | 3.2         | 1.4 |
| NM_013650    | S100a8             | 4.8         | 1.6 | NM_009662    | Alox5              | 3.2         | 1.2 |
| AK019808     | ENSMUST00000056619 | 4.8         | 1.1 | NM_029239    | Prkcn              | 3.2         | 1.2 |
| NM_026184    | Ero11b             | 4.8         | 1.3 | NM_029662    | Mfsd2              | 3.2         | 1.2 |
| AK018656     | Fer114             | 4.7         | 1.2 | NM_010671    | Krtap13            | 3.2         | 1.3 |
| NM_178697    | Cla5               | 4.7         | 1.3 | AK044380     | AK044380           | 3.2         | 1.3 |
| NM_172523    | Slc18a2            | 4.7         | 1.2 | AK035520     | 9530060I07         | 3.2         | 1.2 |
|              |                    |             |     | AK035046     | AK035046           | 3.2         | 1.1 |

| Accession ID | Symbol        | Fold Change | SD  | Accession ID | Symbol             | Fold Change | SD  |
|--------------|---------------|-------------|-----|--------------|--------------------|-------------|-----|
| NM_011913    | Vmd2          | 3.2         | 1.2 | AK034237     | Slc4a8             | 2.6         | 1.2 |
| NM_138654    | AF397014      | 3.2         | 1.2 | BI692008     | BI692008           | 2.6         | 1.2 |
| NM_031168    | Il6           | 3.2         | 1.2 | NM_025478    | Isoc1              | 2.6         | 1.1 |
| AK088370     | Ssb           | 3.2         | 1.3 | NM_194336    | Mpa2l              | 2.6         | 1.3 |
| AK017935     | 5830416P10Rik | 3.1         | 1.3 | NM_025681    | Lix1               | 2.6         | 1.2 |
| AK087182     | 9130023D20Rik | 3.1         | 1.3 | NM_008090    | Gata2              | 2.6         | 1.2 |
| NM_013580    | Ldhc          | 3.1         | 1.3 | AK007796     | 1810046K07Rik      | 2.6         | 1.2 |
| NM_175181    | 2600010E01Rik | 3.1         | 1.3 | NM_008530    | Ly6f               | 2.6         | 1.2 |
| NM_008337    | Ifng          | 3.1         | 1.4 | NM_028176    | Cda                | 2.6         | 1.2 |
| NM_001002786 | 9830134C10Rik | 3.1         | 1.2 | NM_199468    | Zcchc5             | 2.5         | 1.2 |
| NM_177742    | BC050188      | 3.1         | 1.3 | NM_008090    | Gata2              | 2.5         | 1.1 |
| NM_033079    | D6Mm5e        | 3.1         | 1.3 | AK079958     | AK079958           | 2.5         | 1.2 |
| NM_172727    | D330028D13Rik | 3.1         | 1.3 | NM_012046    | Spo11              | 2.5         | 1.1 |
| NM_021443    | Ccl8          | 3.1         | 1.2 | NM_010846    | Mx1                | 2.5         | 1.3 |
| NM_013654    | Ccl7          | 3.1         | 1.3 | XR_003675    | LOC672028          | 2.5         | 1.2 |
| NM_021386    | Cldn10        | 3.1         | 1.3 | NM_017373    | Nfil3              | 2.5         | 1.2 |
| NM_026993    | Ddah1         | 3.1         | 1.4 | NM_181595    | Ppp1r9a            | 2.5         | 1.2 |
| NM_009662    | Alox5         | 3.1         | 1.1 | NM_177794    | Tmem26             | 2.5         | 1.2 |
| NM_007782    | Csf3r         | 3.0         | 1.2 | AK037292     | AK037292           | 2.5         | 1.3 |
| NM_198297    | Trat1         | 3.0         | 1.2 | NM_007954    | Es1                | 2.5         | 1.2 |
| AK051483     | AK051483      | 3.0         | 1.3 | NM_026328    | Reg4               | 2.5         | 1.2 |
| NM_019740    | Foxo3a        | 3.0         | 1.3 | AK037559     | Elk4               | 2.5         | 1.3 |
| BC004622     | Gas5          | 3.0         | 1.2 | NM_010531    | Il18bp             | 2.5         | 1.2 |
| NM_010575    | Itga2b        | 3.0         | 1.2 | NM_013653    | Ccl5               | 2.5         | 1.3 |
| NM_021396    | Pdcd1lg2      | 3.0         | 1.2 | NM_022881    | Rgs18              | 2.4         | 1.3 |
| XM_129603    | Tdrd5         | 3.0         | 1.2 | NM_025777    | 9030623N16Rik      | 2.4         | 1.1 |
| NM_009977    | Cstf          | 3.0         | 1.1 | NM_029419    | 9130022K13Rik      | 2.4         | 1.1 |
| AK036984     | Tnfrsf21      | 3.0         | 1.2 | AK044261     | 6430601A21Rik      | 2.4         | 1.2 |
| NM_008337    | Ifng          | 3.0         | 1.3 | NM_008332    | Ifit2              | 2.4         | 1.2 |
| NM_028416    | Kremen2       | 3.0         | 1.4 | NM_011216    | Ptpro              | 2.4         | 1.2 |
| AK079989     | Air           | 3.0         | 1.1 | XM_905096    | LOC631323          | 2.4         | 1.3 |
| NM_145581    | Siglec f      | 2.9         | 1.2 | AK054519     | AK054519           | 2.4         | 1.3 |
| AK161130     | 4933439C20Rik | 2.9         | 1.1 | AK050122     | BC020489           | 2.4         | 1.3 |
| AK088128     | Cd8a          | 2.9         | 1.2 | NM_007781    | Csf2rb2            | 2.4         | 1.1 |
| NM_183194    | 9930109F21Rik | 2.9         | 1.2 | NM_145684    | Alox12e            | 2.4         | 1.1 |
| AK047983     | C130026I21Rik | 2.9         | 1.2 | NM_008332    | Ifit2              | 2.4         | 1.2 |
| NM_010781    | Mcpt6         | 2.9         | 1.3 | NM_009635    | Avil               | 2.4         | 1.2 |
| XR_002113    | LOC667984     | 2.9         | 1.2 | NM_011463    | Spink4             | 2.4         | 1.2 |
| NM_031378    | Mlze          | 2.9         | 1.2 | NM_020008    | Clec7a             | 2.4         | 1.2 |
| NM_010927    | Nos2          | 2.8         | 1.4 | BC060266     | Ddah1              | 2.4         | 1.2 |
| NM_181596    | Retnlg        | 2.8         | 1.4 | NM_011105    | Pkdrej             | 2.4         | 1.1 |
| NM_011990    | Slc7a11       | 2.8         | 1.3 | BC051162     | ENSMUST00000067474 | 2.4         | 1.2 |
| AK038580     | AK038580      | 2.8         | 1.3 | AK145182     | A1838057           | 2.4         | 1.3 |
| NM_001034037 | 1700024G13Rik | 2.8         | 1.2 | BC033508     | Ccl5               | 2.4         | 1.1 |
| NM_001001495 | 9030611K07Rik | 2.8         | 1.1 | NM_027561    | 4632415L05Rik      | 2.4         | 1.1 |
| AK031009     | AK031009      | 2.8         | 1.2 | AK005698     | ENSMUST00000075658 | 2.3         | 1.2 |
| AK083703     | E430024P14Rik | 2.8         | 1.2 | NM_207208    | Clca6              | 2.3         | 1.2 |
| NM_031367    | H28           | 2.8         | 1.4 | NM_015812    | Rgs6               | 2.3         | 1.2 |
| AK018043     | 5830468K08Rik | 2.8         | 1.3 | AK013531     | 2900016B01Rik      | 2.3         | 1.2 |
| NM_010662    | Krt13         | 2.8         | 1.3 | CA559477     | CA559477           | 2.3         | 1.2 |
| NM_020509    | Retnla        | 2.8         | 1.3 | NM_018729    | Cd244              | 2.3         | 1.1 |
| BC063057     | Lix1          | 2.7         | 1.2 | NM_020279    | Ccl28              | 2.3         | 1.1 |
| NM_145634    | Cd300lf       | 2.7         | 1.1 | NM_175549    | Robo2              | 2.3         | 1.1 |
| TC1487745    | TC1487745     | 2.7         | 1.2 | AK164165     | Cd47               | 2.3         | 1.1 |
| AK088414     | Cd8a          | 2.7         | 1.2 | NM_008330    | Ifi47              | 2.3         | 1.1 |
| AK033359     | AK033359      | 2.7         | 1.3 | XM_001003685 | Gm1752             | 2.3         | 1.2 |
| NM_009556    | Zfp42         | 2.7         | 1.3 | NM_144512    | Slc6a13            | 2.3         | 1.1 |
| AJ426449     | Spink5        | 2.7         | 1.3 | AK048349     | AK048349           | 2.3         | 1.2 |
| NM_029932    | 9830002117Rik | 2.7         | 1.1 | BC092269     | Ighg               | 2.3         | 1.3 |
| NM_020509    | Retnla        | 2.7         | 1.2 | NM_173036    | Gpr97              | 2.3         | 1.2 |
| NM_029239    | Prkcn         | 2.7         | 1.2 | NM_133888    | Smpdl3b            | 2.3         | 1.2 |
| NM_009251    | Serpina3 g    | 2.7         | 1.2 | NM_174876    | Impg2              | 2.3         | 1.2 |
| NM_173047    | Cbr3          | 2.6         | 1.1 | NM_009896    | Socs1              | 2.3         | 1.2 |
| NM_009549    | Zfp185        | 2.6         | 1.2 | NM_054084    | Calcb              | 2.3         | 1.2 |
| NM_020268    | Klk1b27       | 2.6         | 1.3 | NM_207529    | A430093F15Rik      | 2.3         | 1.2 |
| NM_016964    | Stag3         | 2.6         | 1.3 | AK042301     | Nebi               | 2.3         | 1.1 |
| NM_010555    | Il1r2         | 2.6         | 1.2 | NM_144512    | Slc6a13            | 2.3         | 1.1 |
| NM_027889    | Vps11         | 2.6         | 1.2 | NM_008620    | Mpa2               | 2.3         | 1.3 |
| NM_010846    | Mx1           | 2.6         | 1.3 | NM_134041    | 4930427A07Rik      | 2.3         | 1.2 |
| NM_017373    | Nfil3         | 2.6         | 1.2 | AK173009     | Zfp294             | 2.2         | 1.2 |
| NM_008987    | Ptx3          | 2.6         | 1.2 | NM_133871    | Ifi44              | 2.2         | 1.2 |
| NM_198297    | Trat1         | 2.6         | 1.2 | NM_009477    | Upp1               | 2.2         | 1.2 |

| Accession ID | Symbol        | Fold Change | SD  | Accession ID | Symbol             | Fold Change | SD  |
|--------------|---------------|-------------|-----|--------------|--------------------|-------------|-----|
| NM_007576    | C4bp          | 2.2         | 1.1 | AK147402     | E330009J07Rik      | 2.0         | 1.1 |
| NM_183367    | Syt13         | 2.2         | 1.1 | NM_153589    | Tmem16b            | 2.0         | 1.2 |
| NM_010531    | I18bp         | 2.2         | 1.1 | NM_010470    | Hp1bp3             | 2.0         | 1.2 |
| NM_013698    | Txk           | 2.2         | 1.1 | NM_024181    | Dnajc10            | 2.0         | 1.2 |
| TC1413093    | TC1413093     | 2.2         | 1.3 | NM_001039647 | LOC634650          | 2.0         | 1.2 |
| AK005544     | Sel1 h        | 2.2         | 1.3 | NM_008812    | Padi2              | 2.0         | 1.2 |
| NM_021718    | Ms4a4b        | 2.2         | 1.1 | NM_172838    | Slc16a12           | 2.0         | 1.1 |
| AK078537     | AK078537      | 2.2         | 1.2 | NM_009854    | Cd7                | 2.0         | 1.2 |
| AK007434     | 1810011H11Rik | 2.2         | 1.2 | NM_021050    | Cftr               | -2.0        | 1.1 |
| XM_130987    | Rarres1       | 2.2         | 1.2 | NM_021355    | Fmod               | -2.0        | 1.1 |
| NM_021893    | Cd274         | 2.2         | 1.2 | NM_181277    | Col14a1            | -2.0        | 1.1 |
| AK032703     | Anxa4         | 2.2         | 1.3 | AK035414     | Ddr2               | -2.0        | 1.2 |
| NM_134164    | Syt12         | 2.2         | 1.2 | NM_172825    | Gpr128             | -2.0        | 1.1 |
| NM_133238    | Cd209a        | 2.2         | 1.2 | AK017269     | Mfap3l             | -2.0        | 1.2 |
| NM_033616    | Csprs         | 2.2         | 1.2 | NM_180962    | Cyhr1              | -2.0        | 1.1 |
| NM_018738    | Igtp          | 2.2         | 1.3 | NM_022563    | Ddr2               | -2.0        | 1.1 |
| AK013534     | Adora3        | 2.2         | 1.2 | NM_027763    | Trem1              | -2.0        | 1.1 |
| NAP043218-1  | NAP043218-1   | 2.2         | 1.3 | NM_001031808 | Mrpl41             | -2.0        | 1.0 |
| NM_027495    | Tmem144       | 2.2         | 1.1 | NM_022014    | Fn3k               | -2.1        | 1.1 |
| NM_009414    | Tph1          | 2.2         | 1.2 | NM_026127    | 4833420G17Rik      | -2.1        | 1.1 |
| NM_016704    | C6            | 2.2         | 1.2 | L23108       | Cd36               | -2.1        | 1.2 |
| AK028129     | Hist2 h2aa2   | 2.2         | 1.2 | NM_011340    | Serpinf1           | -2.1        | 1.2 |
| AK020954     | B230104C14Rik | 2.2         | 1.3 | NM_023734    | Pi16               | -2.1        | 1.2 |
| NM_023396    | Rprm          | 2.2         | 1.1 | AK160258     | 4933404M19Rik      | -2.1        | 1.2 |
| NM_009858    | Cd8b1         | 2.2         | 1.2 | NM_026239    | Tmem35             | -2.1        | 1.2 |
| AK033165     | AK033165      | 2.2         | 1.2 | AK040611     | Mrg1               | -2.1        | 1.2 |
| NM_009850    | Cd3 g         | 2.2         | 1.1 | AK147474     | Mtap1a             | -2.1        | 1.2 |
| AK005284     | Rint1         | 2.2         | 1.2 | NM_026056    | Cap2               | -2.1        | 1.1 |
| NM_026621    | 2810046M22Rik | 2.1         | 1.1 | AK081137     | Cttnbp2            | -2.1        | 1.2 |
| NM_008418    | Kcna3         | 2.1         | 1.3 | NM_013869    | Tnfrsf19           | -2.1        | 1.2 |
| NM_010555    | Il1r2         | 2.1         | 1.2 | NM_138683    | Rspo1              | -2.1        | 1.3 |
| AK156993     | Nsdhl         | 2.1         | 1.2 | BC020092     | BC020092           | -2.1        | 1.1 |
| NM_008685    | Nfe2          | 2.1         | 1.2 | NM_026056    | Cap2               | -2.1        | 1.1 |
| NM_144940    | Uroc1         | 2.1         | 1.3 | NM_025506    | 2310007A19Rik      | -2.1        | 1.2 |
| NM_199146    | AI451617      | 2.1         | 1.2 | NM_007469    | Apoc1              | -2.1        | 1.3 |
| XM_138240    | LOC238395     | 2.1         | 1.2 | NM_177898    | Nek5               | -2.1        | 1.2 |
| NM_001014761 | Scn2b         | 2.1         | 1.2 | AK037540     | Sec22a             | -2.1        | 1.2 |
| AK043005     | AK043005      | 2.1         | 1.2 | NM_172857    | Exdl1              | -2.2        | 1.2 |
| NM_172451    | Galnt6        | 2.1         | 1.1 | NM_144930    | AU018778           | -2.2        | 1.2 |
| NM_023396    | Rprm          | 2.1         | 1.1 | BC035277     | D1Ert471e          | -2.2        | 1.1 |
| NM_029419    | 9130022K13Rik | 2.1         | 1.1 | NM_028813    | Vit                | -2.2        | 1.1 |
| NM_009695    | Apoc2         | 2.1         | 1.2 | NM_145134    | Spsb4              | -2.2        | 1.2 |
| NM_028455    | 3110043J09Rik | 2.1         | 1.1 | AK006813     | 1700056I18Rik      | -2.2        | 1.2 |
| NM_011027    | P2rx7         | 2.1         | 1.1 | NM_146630    | Olf123             | -2.2        | 1.3 |
| AK083989     | Psmc2         | 2.1         | 1.2 | AK029300     | 1700110N18Rik      | -2.2        | 1.2 |
| AK132500     | Krt36         | 2.1         | 1.1 | NM_134065    | Epdr2              | -2.2        | 1.2 |
| NM_008842    | Pim1          | 2.1         | 1.1 | XM_196478    | BC038167           | -2.2        | 1.3 |
| AK017782     | 5730521K06Rik | 2.1         | 1.2 | NM_178886    | Ldlrad3            | -2.2        | 1.2 |
| AK051067     | AK051067      | 2.1         | 1.2 | NM_176904    | D230002A01Rik      | -2.2        | 1.3 |
| XM_489019    | LOC433637     | 2.1         | 1.2 | NM_024406    | Fabp4              | -2.2        | 1.2 |
| NM_007954    | Es1           | 2.1         | 1.1 | NM_013456    | Actn3              | -2.2        | 1.2 |
| NM_031198    | Tcfec         | 2.1         | 1.1 | NM_019413    | Robo1              | -2.2        | 1.1 |
| AK129290     | Rnf44         | 2.1         | 1.2 | NM_013500    | Hapln1             | -2.2        | 1.2 |
| NM_010741    | Ly6c          | 2.1         | 1.2 | NM_008005    | Fgf18              | -2.2        | 1.3 |
| NM_010831    | Snf1lk        | 2.1         | 1.2 | NM_028903    | Scara5             | -2.2        | 1.2 |
| NM_023124    | H2-Q8         | 2.1         | 1.2 | TC1465377    | TC1465377          | -2.2        | 1.2 |
| NM_021411    | Rab37         | 2.1         | 1.1 | NM_007749    | Cox7c              | -2.2        | 1.2 |
| NM_175284    | Fzd10         | 2.1         | 1.1 | NM_024406    | Fabp4              | -2.2        | 1.2 |
| AK132500     | Krt36         | 2.1         | 1.2 | AK005675     | 1700006H03Rik      | -2.3        | 1.2 |
| NM_001024230 | RP23-14F5.8   | 2.1         | 1.2 | NM_207298    | Ceecam1            | -2.3        | 1.2 |
| AK154286     | Csf2rb1       | 2.1         | 1.1 | NM_024406    | Fabp4              | -2.3        | 1.2 |
| NM_011527    | Tal1          | 2.1         | 1.1 | NM_198429    | Nfatc1             | -2.3        | 1.1 |
| NM_010401    | Hal           | 2.1         | 1.2 | NM_199021    | Dpp10              | -2.3        | 1.1 |
| NM_008920    | Prg2          | 2.1         | 1.2 | AK037592     | AK037592           | -2.3        | 1.3 |
| NM_009289    | Slk           | 2.1         | 1.2 | AK043132     | AK043132           | -2.3        | 1.3 |
| XM_487606    | 1700027L20Rik | 2.1         | 1.2 | NM_026592    | B230118H07Rik      | -2.3        | 1.1 |
| NM_010330    | Emb           | 2.1         | 1.1 | TC1435794    | TC1435794          | -2.3        | 1.1 |
| AK030809     | Grap2         | 2.0         | 1.2 | NP062288     | ENSMUST00000065540 | -2.3        | 1.2 |
| NM_024257    | Hdh3          | 2.0         | 1.1 | NM_009144    | Sfrp2              | -2.3        | 1.2 |
| NM_021389    | Sh3kbp1       | 2.0         | 1.1 | AK004394     | 1110067I12Rik      | -2.3        | 1.2 |
| NM_172777    | BC057170      | 2.0         | 1.2 | AK014446     | Pvr                | -2.3        | 1.3 |
| NM_027008    | Kctd5         | 2.0         | 1.2 | AK158826     | Thrb               | -2.3        | 1.1 |

| Accession ID | Symbol        | Fold Change | SD  | Accession ID | Symbol        | Fold Change | SD  |
|--------------|---------------|-------------|-----|--------------|---------------|-------------|-----|
| NM_177789    | Vsig4         | -2.4        | 1.3 | NM_001039244 | LOC633640     | -3.7        | 1.1 |
| NM_001013022 | 2010001J22Rik | -2.4        | 1.2 | AK014177     | 3110045C21Rik | -3.7        | 1.3 |
| AK020667     | Helz          | -2.4        | 1.2 | AK017536     | 5730409L17Rik | -3.8        | 1.4 |
| NM_026716    | Syncn         | -2.4        | 1.2 | AK008688     | Cyp2c65       | -3.8        | 1.4 |
| NM_138595    | Gldc          | -2.4        | 1.2 | NM_016847    | Avpr1a        | -3.8        | 1.2 |
| AK132148     | 3321401G04Rik | -2.4        | 1.2 | AK050117     | AK050117      | -3.8        | 1.3 |
| NM_011196    | Ptger3        | -2.4        | 1.2 | AK018404     | 4930429M06Rik | -3.9        | 1.2 |
| NM_001001985 | 1110038O08Rik | -2.4        | 1.3 | BC086760     | 2610005L07Rik | -3.9        | 1.0 |
| NM_007620    | Cbr1          | -2.5        | 1.1 | NM_176841    | A430106J12Rik | -3.9        | 1.5 |
| NM_010298    | Glrp          | -2.5        | 1.2 | NM_007739    | Col8a1        | -4.0        | 1.2 |
| XM_129027    | Cep76         | -2.5        | 1.1 | XM_001004301 | LOC668030     | -4.0        | 1.3 |
| AK030564     | Peli2         | -2.5        | 1.2 | NM_026084    | 3110070M22Rik | -4.1        | 1.3 |
| XM_887155    | Igsf10        | -2.5        | 1.2 | NM_172613    | Atp13a4       | -4.2        | 1.4 |
| AK083037     | Ccnt1         | -2.5        | 1.3 | AK035884     | Sf3b5         | -4.3        | 1.4 |
| NM_016694    | Park2         | -2.5        | 1.2 | AK013921     | LOC627905     | -4.3        | 1.1 |
| NM_029620    | Pcolce2       | -2.5        | 1.3 | AJ005350     | Zfp125        | -4.4        | 1.3 |
| NM_025943    | Dzip1         | -2.5        | 1.3 | NM_175155    | Sash1         | -4.4        | 1.3 |
| NM_029813    | 2210418O10Rik | -2.5        | 1.2 | NM_175683    | Dclre1c       | -4.4        | 1.2 |
| XM_485258    | Mtap9         | -2.5        | 1.2 | XM_912173    | LOC636687     | -4.7        | 1.1 |
| XM_144099    | Myom3         | -2.6        | 1.3 | AK134636     | 2610005L07Rik | -4.7        | 1.1 |
| NM_026713    | Mogat1        | -2.6        | 1.3 | NM_001024708 | LOC436177     | -4.8        | 1.0 |
| U76382       | U76382        | -2.6        | 1.3 | NAP102794-1  | NAP102794-1   | -4.9        | 1.6 |
| AK045433     | Rsrc1         | -2.6        | 1.3 | NM_001033456 | 2610005L07Rik | -4.9        | 1.1 |
| NM_177274    | Negr1         | -2.6        | 1.3 | AK019912     | 5330426P16Rik | -5.1        | 1.2 |
| NM_008949    | Psmc3ip       | -2.6        | 1.1 | NM_009866    | Cdh11         | -5.3        | 1.1 |
| NM_018769    | Dfna5 h       | -2.6        | 1.1 | AK041002     | Tubb6         | -5.3        | 1.2 |
| AK163997     | AK163997      | -2.6        | 1.3 | NM_145509    | 5430435G22Rik | -5.5        | 1.2 |
| NM_183336    | Igsf1         | -2.7        | 1.3 | AK087131     | AK087131      | -5.7        | 1.6 |
| AK034126     | 9330158F14Rik | -2.7        | 1.3 | NM_011619    | Tnnt2         | -5.9        | 1.4 |
| NM_201531    | Kcnf1         | -2.7        | 1.2 | AK003102     | 1810011O10Rik | -6.0        | 1.2 |
| AK086129     | AK086129      | -2.7        | 1.3 | NM_207531    | E030025L21Rik | -6.1        | 1.5 |
| AK016003     | 4930539N22Rik | -2.7        | 1.4 | NM_178671    | Ubx3          | -6.5        | 1.2 |
| NM_001024708 | LOC436177     | -2.7        | 1.1 | NM_145146    | Afm           | -6.7        | 1.7 |
| NM_001011707 | Cyp2c66       | -2.7        | 1.3 | XM_901598    | Hs3 st2       | -6.7        | 1.8 |
| NM_008949    | Psmc3ip       | -2.7        | 1.2 | BC022221     | Usp53         | -7.5        | 1.1 |
| AK045826     | AK045826      | -2.7        | 1.3 | NM_007845    | Defcr-rs10    | -8.0        | 1.3 |
| AK018789     | Ntrk2         | -2.8        | 1.2 | NM_001033286 | Slc30a10      | -8.1        | 1.3 |
| NM_080285    | Cttnbp2       | -2.8        | 1.2 | TC1514537    | TC1514537     | -8.4        | 1.2 |
| NM_053262    | Dhrs8         | -2.8        | 1.2 | AK081879     | LOC547150     | -8.9        | 1.2 |
| XM_984346    | LOC675694     | -2.8        | 1.2 | NM_001002900 | Yghl1-4       | -9.3        | 1.4 |
| AK149452     | 9030618K22Rik | -2.8        | 1.3 | NM_029847    | Arsk          | -9.3        | 1.5 |
| NM_001024849 | LOC329575     | -2.9        | 1.1 | NM_027504    | Prdm16        | -11         | 1.7 |
| NAP055203-1  | NAP055203-1   | -2.9        | 1.4 | AK032413     | 1110039F03Rik | -12         | 1.2 |
| NM_177605    | Pdzd7         | -2.9        | 1.2 | XM_001000961 | 5830417I10Rik | -13         | 1.8 |
| NM_008745    | Ntrk2         | -2.9        | 1.3 | NM_010855    | Myh4          | -13         | 2.2 |
| NM_177003    | 9630033F20Rik | -2.9        | 1.2 | NM_007847    | Defcr-rs2     | -15         | 1.3 |
| NM_028089    | Cyp2c55       | -2.9        | 1.4 | NM_007847    | Defcr-rs2     | -18         | 1.3 |
| BC059210     | 2210418O10Rik | -3.0        | 1.1 | NM_001033286 | Slc30a10      | -26         | 1.5 |
| AK048420     | Fzd2          | -3.0        | 1.2 | NM_175155    | Sash1         | -38         | 1.5 |
| AK017575     | 5730419F03Rik | -3.0        | 1.4 | AY040842     | 5830417I10Rik | -117        | 2.6 |
| NM_013521    | Fpr1          | -3.0        | 1.2 | NM_013541    | Gstp1         | -184        | 1.4 |
| XM_355539    | Camt1         | -3.0        | 1.2 | NM_013541    | Gstp1         | -490        | 1.6 |
| NM_008067    | Gabra3        | -3.0        | 1.3 |              |               |             |     |
| NM_025943    | Dzip1         | -3.0        | 1.3 |              |               |             |     |
| BC042711     | LOC626832     | -3.1        | 1.1 |              |               |             |     |
| NM_175731    | Asah3         | -3.1        | 1.2 |              |               |             |     |
| AK007397     | Adh6a         | -3.1        | 1.2 |              |               |             |     |
| NM_009799    | Car1          | -3.1        | 1.4 |              |               |             |     |
| AK030674     | Col8a1        | -3.2        | 1.2 |              |               |             |     |
| NM_026127    | 4833420G17Rik | -3.2        | 1.1 |              |               |             |     |
| NM_146126    | Sord          | -3.3        | 1.4 |              |               |             |     |
| NM_008868    | Pla2 g2c      | -3.3        | 1.2 |              |               |             |     |
| AK013921     | LOC627905     | -3.3        | 1.1 |              |               |             |     |
| NM_015825    | Sh3bgr        | -3.3        | 1.1 |              |               |             |     |
| AK051244     | AK051244      | -3.4        | 1.3 |              |               |             |     |
| XM_898153    | Cttnbp2       | -3.5        | 1.4 |              |               |             |     |
| NM_207531    | E030025L21Rik | -3.6        | 1.3 |              |               |             |     |
| AK043729     | Iars2         | -3.6        | 1.2 |              |               |             |     |
| NM_153523    | Tcstv3        | -3.6        | 1.2 |              |               |             |     |
| BC028441     | Mosc1         | -3.6        | 1.3 |              |               |             |     |
| NM_001033456 | 2610005L07Rik | -3.7        | 1.2 |              |               |             |     |
| AK036567     | Mgat5         | -3.7        | 1.1 |              |               |             |     |

All genes differentially expressed in *Gstp*-null *Apc<sup>Min</sup>* colon relative to *Gstp*-wt *Apc<sup>Min</sup>* colon. Colon RNA from three male 10 week old and three female 10 week old mice of the same genotype were used for microarray analysis. The experiments were carried out with the RNA from a single mouse on a single microarray. The results shown are the averages of the six microarrays (three male and three female); standard deviation is shown in the right-hand column. Up-regulated genes had a level > 2 times greater than that of wild-type colon tissue. Genes classified as down-regulated had a level < 2 of wild-type colon tissue.

**Table S4. Top 10 pathway enrichment results for differentially expressed genes in the distal colon of *Gstp*-null *Apc*<sup>Min</sup> relative to *Gstp*-wt *Apc*<sup>Min</sup> mice**

| Rank | Pathway                                                             |
|------|---------------------------------------------------------------------|
| 1    | Immune response: CD16 signaling in NK cells                         |
| 2    | Development:TPO signalling via JAK-STAT pathway                     |
| 3    | Immune response: Antiviral actions of interferons                   |
| 4    | Immune response: CCR3 signaling in eosinophils                      |
| 5    | Immune response: Bacterial infections in normal airways             |
| 6    | Immune response: TCR and CD28 co-stimulation in activation of NF-kB |
| 7    | Immune response: NFAT in immune response                            |
| 8    | Immune response: CD28 signaling                                     |
| 9    | Immune response: Role of DAP12 receptors in NK cells                |
| 10   | Immune response: Antigen presentation by MHC class I                |

Table S5.

| Accession ID       | Symbol             | Fold Change | SD  | Accession ID | Symbol        | Fold Change | SD  |
|--------------------|--------------------|-------------|-----|--------------|---------------|-------------|-----|
| AK017277           | 5430405N12Rik      | 252         | 1.2 | NM_007969    | Expi          | -2.4        | 1.1 |
| BC078460           | A630033E08Rik      | 62          | 1.2 | NM_172601    | Rab2b         | -2.5        | 1.2 |
| NM_010201          | Fgf14              | 29          | 1.7 | NM_026081    | Gprasp1       | -2.5        | 1.2 |
| NM_145457          | Paip1              | 14          | 1.1 | BC100555     | Sox14         | -2.6        | 1.1 |
| NM_028815          | Lrriq2             | 10          | 1.4 | NM_145943    | BC031781      | -2.7        | 1.2 |
| ENSMUST00000066907 | ENSMUST00000066907 | 10          | 1.1 | NM_172633    | Cbln2         | -2.7        | 1.2 |
| NM_054088          | Pnpla3             | 10          | 1.3 | AK005093     | Etohi1        | -2.7        | 1.1 |
| NM_028416          | Kremen2            | 9.9         | 1.4 | NM_001025568 | Pde1c         | -2.7        | 1.1 |
| NM_177628          | BC065085           | 8.9         | 1.2 | NM_013900    | Mfi2          | -2.7        | 1.1 |
| AK035714           | AK035714           | 7.6         | 1.2 | AK038688     | A230055C15    | -2.7        | 1.2 |
| AK136384           | AK136384           | 7.6         | 1.2 | AK031268     | Odz3          | -2.8        | 1.2 |
| XM_618738          | Lats1              | 7.1         | 1.3 | NM_153288    | Npb           | -2.8        | 1.2 |
| ENSMUST00000056619 | ENSMUST00000056619 | 7.0         | 1.3 | AK013921     | LOC627905     | -2.8        | 1.2 |
| NM_023879          | Rpgrip1            | 5.5         | 1.3 | NM_026127    | 4833420G17Rik | -2.9        | 1.1 |
| NM_028455          | 3110043J09Rik      | 5.1         | 1.2 | XM_001003068 | Kcnt2         | -2.9        | 1.1 |
| NM_001013785       | Akr1c19            | 5.0         | 1.2 | NM_008919    | Ppyr1         | -2.9        | 1.1 |
| AK033329           | AK033329           | 4.1         | 1.2 | NM_011857    | Odz3          | -3.0        | 1.1 |
| NM_028122          | Slc14a1            | 4.0         | 1.2 | NM_198429    | Nfatc1        | -3.0        | 1.2 |
| NM_145457          | Paip1              | 3.9         | 1.1 | AK011113     | Plxnc1        | -3.0        | 1.1 |
| NM_027308          | 2210010C17Rik      | 3.8         | 1.2 | NM_009866    | Cdh11         | -3.0        | 1.1 |
| NM_177596          | Gm4769             | 3.6         | 1.2 | NM_001024708 | LOC436177     | -3.1        | 1.0 |
| AK090155           | Pick1              | 3.6         | 1.2 | NM_175122    | Rab39b        | -3.1        | 1.2 |
| NM_138654          | AF397014           | 3.5         | 1.1 | NM_178421    | Nanos1        | -3.2        | 1.2 |
| BC049694           | Cdkn3              | 3.5         | 1.2 | AK041002     | Tubb6         | -3.2        | 1.1 |
| NM_138654          | AF397014           | 3.4         | 1.1 | NM_172857    | Exdl1         | -3.2        | 1.2 |
| AK041055           | AK041055           | 3.3         | 1.1 | BC086760     | 2610005L07Rik | -3.2        | 1.1 |
| NM_008719          | Npas2              | 3.3         | 1.1 | NM_009866    | Cdh11         | -3.2        | 1.2 |
| NM_053115          | Acox2              | 3.0         | 1.2 | NM_026127    | 4833420G17Rik | -3.4        | 1.1 |
| NM_008396          | Itga2              | 3.0         | 1.2 | NM_023908    | Slco3a1       | -3.5        | 1.2 |
| S57425             | S57425             | 2.8         | 1.1 | NM_019511    | Ramp3         | -3.5        | 1.2 |
| NM_028769          | Syvn1              | 2.7         | 1.2 | NM_181728    | Art3          | -3.6        | 1.2 |
| NM_018784          | St3_gal6           | 2.5         | 1.2 | AK019912     | 5330426P16Rik | -3.6        | 1.2 |
| AK005363           | 1500035N22Rik      | 2.4         | 1.1 | NM_134096    | AW049604      | -3.6        | 1.2 |
| NM_146061          | Arhgap8            | 2.3         | 1.1 | AK002772     | Pcp4l1        | -3.7        | 1.2 |
| NM_025517          | Rtcd1              | 2.3         | 1.1 | NM_138595    | Gldc          | -3.7        | 1.2 |
| NM_025517          | Rtcd1              | 2.3         | 1.1 | AK029300     | Vgll3         | -3.8        | 1.2 |
| NM_177003          | 9630033F20Rik      | 2.3         | 1.0 | AK017641     | 5730446C15Rik | -3.8        | 1.2 |
| NM_010587          | Itsn1              | 2.2         | 1.1 | BC086641     | Slc44a5       | -3.8        | 1.2 |
| NM_027627          | 4931408A02Rik      | 2.2         | 1.1 | BC049168     | 2300002D11Rik | -3.8        | 1.2 |
| AK018948           | Arl9               | 2.1         | 1.1 | NM_026056    | Cap2          | -3.8        | 1.2 |
| NM_028639          | Ttc7               | 2.1         | 1.1 | AK003102     | 1810011O10Rik | -3.8        | 1.2 |
| NM_008255          | Hmgcr              | 2.1         | 1.1 | AK135586     | AK135586      | -3.8        | 1.2 |
| XM_989409          | Rbm24              | 2.1         | 1.1 | AK054185     | Mrpl3         | -3.9        | 1.2 |
| NM_153484          | Tef                | 2.1         | 1.1 | NM_145621    | Camkv         | -3.9        | 1.2 |
| NM_145462          | D14Erttd500e       | 2.0         | 1.1 | NM_172491    | D130040H23Rik | -3.9        | 1.2 |
| NM_031404          | Actl6b             | 2.0         | 1.1 | NM_007739    | Col8a1        | -4.1        | 1.2 |
| NM_030203          | Tspyl4             | -2.0        | 1.1 | AK158826     | Thrb          | -4.1        | 1.1 |
| NM_008394          | lsgf3_g            | -2.0        | 1.1 | XM_912173    | LOC636687     | -4.2        | 1.2 |
| NM_028245          | Zfp131             | -2.1        | 1.1 | NM_138742    | Nap1l3        | -4.3        | 1.1 |
| NM_008624          | Mras               | -2.1        | 1.1 | AK013921     | LOC627905     | -4.3        | 1.2 |
| AK030569           | Dynlt1             | -2.1        | 1.1 | AK162561     | 3110052M02Rik | -4.3        | 1.2 |
| AK013505           | AK013505           | -2.1        | 1.1 | NM_177003    | 9630033F20Rik | -4.4        | 1.1 |
| AK040984           | Osbpl3             | -2.2        | 1.1 | NM_025585    | 1700029F12Rik | -4.5        | 1.1 |
| XM_129027          | Cep76              | -2.2        | 1.1 | NM_001024708 | LOC436177     | -4.9        | 1.3 |
| NM_174868          | C030011O14Rik      | -2.2        | 1.1 | NM_007867    | Dlx4          | -4.9        | 1.1 |
| NM_177163          | B330016D10Rik      | -2.2        | 1.1 | NM_026084    | 3110070M22Rik | -5.0        | 1.2 |
| AK035414           | Ddr2               | -2.2        | 1.1 | NM_001033456 | 2610005L07Rik | -5.2        | 1.2 |
| AK083037           | Ccnt1              | -2.3        | 1.1 | NM_001024708 | LOC436177     | -5.3        | 1.1 |
| NM_021334          | Itgax              | -2.3        | 1.1 | BC022221     | Usp53         | -5.3        | 1.1 |
| NM_026880          | Pink1              | -2.3        | 1.1 | NM_016694    | Park2         | -5.4        | 1.3 |
| NM_172633          | Cbln2              | -2.4        | 1.1 | TC1635888    | TC1635888     | -5.6        | 1.3 |
| NM_016685          | Comp               | -2.4        | 1.1 | NM_177049    | Jph4          | -5.8        | 1.3 |
| NM_177167          | Ppm1e              | -2.4        | 1.1 | NM_028176    | Cda           | -5.9        | 1.2 |
| BC072607           | 4930505D03Rik      | -2.4        | 1.1 | NM_172628    | Sh3tc2        | -6.0        | 1.3 |
|                    |                    |             |     | NM_009866    | Cdh11         | -6.2        | 1.1 |

| Accession ID | Symbol        | Fold Change | SD  |
|--------------|---------------|-------------|-----|
| AK134636     | 2610005L07Rik | -6.3        | 1.1 |
| AK076632     | 1700013E18Rik | -6.3        | 1.2 |
| NM_026056    | Cap2          | -6.4        | 1.2 |
| TC1620718    | TC1620718     | -6.5        | 1.4 |
| NM_173442    | Gcnt1         | -6.7        | 1.3 |
| NM_001012392 | U46068        | -6.9        | 1.3 |
| NM_025585    | 1700029F12Rik | -7.0        | 1.1 |
| AK014177     | 3110045C21Rik | -7.2        | 1.2 |
| NM_183136    | Spink8        | -7.6        | 1.2 |
| AK014446     | Pvr           | -7.7        | 1.4 |
| AK032413     | 1110039F03Rik | -8.1        | 1.3 |
| AK030294     | BC007180      | -8.2        | 1.3 |
| AJ005350     | Zfp125        | -10         | 1.4 |
| NM_007850    | Defcr3        | -12         | 1.4 |
| NM_011880    | Rgs7          | -12         | 1.4 |
| NM_007852    | Defcr6        | -13         | 1.4 |
| NM_001012307 | Defcr23       | -14         | 1.4 |
| NM_183268    | Defcr20       | -15         | 1.5 |
| NM_175155    | Sash1         | -18         | 1.4 |
| NM_010039    | Defcr4        | -20         | 1.5 |
| NM_010031    | Defa1         | -20         | 1.4 |
| AK081879     | LOC547150     | -26         | 1.3 |
| NM_207658    | Defcr22       | -27         | 1.5 |
| TC1686295    | TC1686295     | -27         | 1.2 |
| NM_007848    | Defcr-rs7     | -437        | 1.6 |
| NM_007846    | Defcr-rs12    | -616        | 1.3 |
| NM_013541    | Gstp1         | -868        | 1.1 |
| NM_013541    | Gstp1         | -1878       | 1.1 |
| NM_007845    | Defcr-rs10    | -7979       | 1.3 |
| NM_007847    | Defcr-rs2     | -15076      | 1.4 |
| NM_007847    | Defcr-rs2     | -18561      | 1.3 |

All genes differentially expressed in *Gstp*-null *Apc<sup>Min</sup>* adenomas relative to *Gstp*-wt *Apc<sup>Min</sup>* adenomas. RNA from four adenomas from four individual mice (1 adenoma per mouse) of each genotype was used for microarray analysis. The experiments were carried out with the RNA from a single adenoma on a single microarray. The results shown are the average of the four microarrays for each genotype; standard deviation is shown in the right-hand column. Up-regulated genes had a level > 2 times greater than that of control adenoma tissue. Genes classified as down-regulated had a level < 2 of control adenoma tissue.
